# Supplementary material for: Influence of Sex on Neuroretinal Degeneration: Six-Month Follow-Up in Rats With Chronic Glaucoma
Source: PubMed Central journal article supplement — Invest Ophthalmol Vis Sci. 2021 Oct 13;62(13):9. doi: 10.1167/iovs.62.13.9 (PMC8525827; doi:10.1167/iovs.62.13.9), 2021-10-13
Supplement: iovs-62-13-9_s001.pdf [file iovs-62-13-9_s001.pdf]

| IOP (mmHg) ACCORDING TO SEX AND GLAUCOMA MODEL |              |               |              |              |              |              |
|------------------------------------------------|--------------|---------------|--------------|--------------|--------------|--------------|
| TIME                                           | EPIIm        |               | p            | MS 20/10     |              | p            |
|                                                | MALE         | FEMALE        |              | MALE         | FEMALE       |              |
| <b>BASELINE</b>                                | 11.31 ± 1.18 | 10.76 ± 1.18  | 0.304        | 9.77 ± 1.71  | 10.12 ± 0.88 | 0.251        |
| <b>1 w</b>                                     | 21.99 ± 4.55 | 22.79 ± 3.76  | 0.411        | 13.55 ± 4.30 | 14.22 ± 2.26 | 0.173        |
| <b>2 w</b>                                     | 23.13 ± 3.64 | 22.25 ± 3.11  | 0.861        | 15.00 ± 3.42 | 15.16 ± 3.58 | 0.811        |
| <b>3 w</b>                                     | 22.97 ± 4.30 | 21.79 ± 3.75  | 0.464        | 17.77 ± 3.96 | 16.93 ± 3.89 | 0.684        |
| <b>4 w</b>                                     | 24.19 ± 3.68 | 24.10 ± 3.81  | 0.726        | 17.00 ± 4.03 | 16.58 ± 3.02 | 0.932        |
| <b>5 w</b>                                     | 24.60 ± 2.40 | 19.86 ± 8.13  | 0.054        | 18.44 ± 4.12 | 16.95 ± 4.76 | 0.183        |
| <b>6 w</b>                                     | 27.38 ± 2.79 | 26.75 ± 3.35  | 0.661        | 18.07 ± 5.67 | 19.37 ± 4.59 | 0.426        |
| <b>7 w</b>                                     | 27.79 ± 5.31 | 29.10 ± 8.22  | 0.974        | 15.77 ± 2.68 | 14.91 ± 3.29 | 0.534        |
| <b>8 w</b>                                     | 29.26 ± 7.76 | 29.10 ± 7.82  | 0.897        | 18.66 ± 3.41 | 16.97 ± 3.61 | 0.257        |
| <b>9 w</b>                                     | 30.16 ± 5.49 | 23.15 ± 5.19  | <b>0.019</b> | 16.95 ± 4.97 | 16.38 ± 3.56 | 0.737        |
| <b>10 w</b>                                    | 27.00 ± 4.60 | 20.71 ± 2.70  | <b>0.003</b> | 18.38 ± 5.40 | 15.63 ± 3.12 | 0.213        |
| <b>11 w</b>                                    | 20.00 ± 5.36 | 18.85 ± 5.14  | 0.620        | 18.28 ± 3.50 | 17.80 ± 2.92 | 0.641        |
| <b>12 w</b>                                    | 19.60 ± 3.20 | 18.92 ± 3.12  | 0.576        | 22.19 ± 5.48 | 20.36 ± 3.56 | 0.962        |
| <b>13 w</b>                                    | 18.26 ± 3.11 | 17.72 ± 3.33  | 0.610        | 17.53 ± 2.53 | 17.99 ± 3.09 | 0.870        |
| <b>14 w</b>                                    | 20.13 ± 2.02 | 16.87 ± 3.90  | 0.126        | 21.19 ± 1.96 | 19.66 ± 3.56 | 0.366        |
| <b>15 w</b>                                    | 20.26 ± 4.36 | 16.57 ± 4.17  | 0.126        | 21.73 ± 3.87 | 18.52 ± 5.09 | 0.465        |
| <b>16 w</b>                                    | 22.39 ± 2.52 | 17.06 ± 3.73  | <b>0.008</b> | 23.13 ± 2.82 | 17.85 ± 3.99 | <b>0.021</b> |
| <b>17 w</b>                                    | 18.86 ± 2.39 | 17.93 ± 2.18  | 0.533        | 19.93 ± 1.90 | 17.47 ± 3.51 | 0.120        |
| <b>18 w</b>                                    | 17.66 ± 2.77 | 16.54 ± 2.94  | 0.460        | 18.86 ± 2.41 | 17.38 ± 2.54 | 0.324        |
| <b>19 w</b>                                    | 17.99 ± 1.90 | 15.62 ± 3.154 | 0.234        | 25.16 ± 3.53 | 23.74 ± 3.42 | 0.813        |
| <b>20 w</b>                                    | 18.33 ± 1.18 | 15.33 ± 2.90  | <b>0.050</b> | 21.99 ± 6.12 | 21.91 ± 3.34 | 0.999        |
| <b>21 w</b>                                    | 20.49 ± 4.39 | 15.66 ± 2.93  | 0.088        | 25.33 ± .47  | 22.99 ± 1.56 | 0.065        |
| <b>22 w</b>                                    | 22.33 ± 1.51 | 18.74 ± 4.32  | <b>0.042</b> | 20.66 ± 3.30 | 16.41 ± 3.98 | 0.352        |
| <b>23 w</b>                                    | 19.83 ± 1.83 | 17.20 ± 3.69  | 0.174        | 30.16 ± 4.47 | 23.08 ± 3.03 | 0.065        |
| <b>24 w</b>                                    | 22.16 ± 5.50 | 22.16 ± 3.77  | 0.999        | 28.16 ± 0.23 | 20.66 ± 2.01 | 0.065        |

**Supplementary Table S1: Intraocular pressure measurements according to sex in both glaucoma models over 24 weeks of follow-up.** IOP: intraocular pressure; EPIIm: episcleral sclerosis model; Ms20/10: microsphere 20/10 model; w: week; p < 0.05: statistical significance.
