# Supplementary material for: Influence of Sex on Neuroretinal Degeneration: Six-Month Follow-Up in Rats With Chronic Glaucoma
Source: PubMed Central journal article supplement — Invest Ophthalmol Vis Sci. 2021 Oct 13;62(13):9. doi: 10.1167/iovs.62.13.9 (PMC8525827; doi:10.1167/iovs.62.13.9), 2021-10-13
Supplement: iovs-62-13-9_s002.pdf [file iovs-62-13-9_s002.pdf]

## NEURORETINAL MEASUREMENTS ACCORDING TO SEX IN THE EPIm

| OCT PARAMETERS (µm)      | BASELINE       | p    | 8 w            | p    | 12 w           | p     | 18 w           | p    | 24 w           | p    |
|--------------------------|----------------|------|----------------|------|----------------|-------|----------------|------|----------------|------|
| <b>RETINAL THICKNESS</b> |                |      |                |      |                |       |                |      |                |      |
| CENTRAL                  | 268.63 ± 12.91 | 0.50 | 267.00 ± 15.52 | 0.85 | 272.40 ± 16.89 | 0.30  | 242.00         | 0.18 | 232.00         | 0.13 |
|                          | 272.24 ± 14.77 |      | 263.75 ± 1.15  |      | 262.46 ± 19.29 |       | 257.33 ± 10.78 |      | 258.83 ± 16.52 |      |
| INNER INFERIOR           | 257.63 ± 8.79  | 0.39 | 258.38 ± 9.10  | 0.15 | 261.40 ± 8.38  | 0.05  | 240.00         | 0.18 | 258.00         | 0.13 |
|                          | 255.59 ± 8.01  |      | 251.75 ± 5.68  |      | 252.31 ± 8.46  |       | 251.33 ± 11.06 |      | 242.83 ± 12.67 |      |
| OUTER INFERIOR           | 248.38 ± 9.05  | 0.52 | 248.37 ± 8.18  | 0.15 | 258.40 ± 10.06 | 0.09  | 230.00         | 0.18 | 255.00         | 0.13 |
|                          | 247.06 ± 5.66  |      | 243.00 ± 6.55  |      | 248.23 ± 10.86 |       | 246.33 ± 8.08  |      | 234.50 ± 9.67  |      |
| INNER SUPERIOR           | 248.75 ± 8.27  | 0.52 | 259.63 ± 39.31 | 0.28 | 271.20 ± 30.88 | 0.13  | 244.00         | 0.18 | 252.00         | 0.13 |
|                          | 250.76 ± 8.18  |      | 245.75 ± 4.50  |      | 246.15 ± 16.85 |       | 239.00 ± 3.00  |      | 239.00 ± 9.77  |      |
| OUTER SUPERIOR           | 249.37 ± 8.74  | 0.61 | 261.75 ± 26.80 | 0.21 | 281.60 ± 31.50 | 0.01* | 257.00         | 0.18 | 265.00         | 0.13 |
|                          | 251.59 ± 5.12  |      | 249.50 ± 2.00  |      | 252.31 ± 12.40 |       | 242.67 ± 6.65  |      | 242.33 ± 14.30 |      |
| INNER NASAL              | 254.88 ± 5.79  | 0.31 | 258.38 ± 21.08 | 0.48 | 270.80 ± 18.07 | 0.01* | 255.00         | 0.18 | 261.00         | 0.13 |
|                          | 252.59 ± 6.76  |      | 251.25 ± 5.00  |      | 248.08 ± 12.10 |       | 250.67 ± 9.01  |      | 245.50 ± 17.81 |      |
| OUTER NASAL              | 249.88 ± 8.18  | 0.50 | 256 ± 21.50    | 0.27 | 274.80 ± 20.52 | 0.00* | 247.00         | 1.00 | 266.00         | 0.14 |
|                          | 248.59 ± 5.43  |      | 248.50 ± 2.88  |      | 247.85 ± 12.24 |       | 246.67 ± 7.50  |      | 246.80 ± 2.77  |      |
| INNER TEMPORAL           | 251.63 ± 10.36 | 0.86 | 261.13 ± 43.34 | 0.10 | 270.80 ± 33.73 | 0.06  | 251.00         | 0.18 | 261.00         | 0.31 |
|                          | 253.94 ± 10.09 |      | 247.50 ± 1.52  |      | 247.00 ± 12.04 |       | 241.00 ± 4.35  |      | 246.17 ± 13.60 |      |
| OUTER TEMPORAL           | 250.00 ± 10.26 | 0.88 | 263.38 ± 37.54 | 0.15 | 278.60 ± 39.33 | 0.04  | 256.00         | 0.18 | 267.00         | 0.31 |
|                          | 249.94 ± 8.01  |      | 249.00 ± 2.51  |      | 252.54 ± 12.57 |       | 247.00 ± 3.60  |      | 249.50 ± 16.45 |      |
| TOTAL VOLUME             | 1.92 ± 0.09    | 0.48 | 1.83 ± 0.16    | 0.27 | 1.91 ± 0.14    | 0.03  | 1.75           | 0.65 | 1.82           | 0.20 |
|                          | 1.93 ± 0.06    |      | 1.76 ± 0.00    |      | 1.77 ± 0.07    |       | 1.747 ± 0.04   |      | 1.69 ± 0.17    |      |
| <b>RNFL THICKNESS</b>    |                |      |                |      |                |       |                |      |                |      |
| GLOBAL                   | 46.50 ± 3.42   | 0.77 | 39.00 ± 1.00   | 0.18 | 47.33 ± 14.92  | 0.80  | 36.00          | 0.18 | 42.00          | 0.61 |
|                          | 46.00 ± 4.83   |      | 44.25 ± 4.50   |      | 41.36 ± 5.96   |       | 43.67 ± 4.16   |      | 40.67 ± 4.59   |      |
| INFERIOR TEMPORAL        | 53.88 ± 16.14  | 0.56 | 40.57 ± 3.78   | 0.82 | 32.00 ± 16.07  | 0.03  | 32.00          | 0.65 | 37.00          | 1.00 |
|                          | 46.29 ± 7.00   |      | 40 ± 7.02      |      | 46.00 ± 8.01   |       | 37.00 ± 13.45  |      | 38.50 ± 4.84   |      |
| INFERIOR NASAL           | 49.63 ± 8.83   | 0.64 | 46.14 ± 3.60   | 0.65 | 46.50 ± 7.89   | 0.62  | 28.00          | 0.18 | 40.00          | 0.61 |
|                          | 47.82 ± 8.15   |      | 44.25 ± 9.64   |      | 44.50 ± 10.09  |       | 45.33 ± 12.74  |      | 42.83 ± 9.53   |      |
| SUPERIOR TEMPORAL        | 47.87 ± 7.79   | 0.95 | 38.57 ± 14.97  | 0.12 | 54.50 ± 35.85  | 0.38  | 32.00          | 0.18 | 34.00          | 0.31 |
|                          | 48.53 ± 9.49   |      | 52.75 ± 6.02   |      | 38.93 ± 11.65  |       | 43.33 ± 5.68   |      | 41.00 ± 13.56  |      |
| SUPERIOR NASAL           | 35.00 ± 9.13   | 0.20 | 33.86 ± 16.28  | 0.51 | 40.00 ± 37.13  | 0.96  | 34.00          | 0.65 | 35.00          | 1.00 |
|                          | 40.24 ± 9.31   |      | 39.75 ± 1.52   |      | 30.79 ± 13.78  |       | 34.00 ± 2.64   |      | 35.67 ± 9.48   |      |
| NASAL                    | 41.25 ± 7.40   | 0.20 | 42.14 ± 4.35   | 0.18 | 50.33 ± 10.50  | 0.02  | 42.00          | 0.65 | 48.00          | 0.13 |
|                          | 44.82 ± 6.92   |      | 41.25 ± 2.64   |      | 40.07 ± 5.39   |       | 46.33 ± 7.23   |      | 42.50 ± 3.14   |      |
| TEMPORAL                 | 51.63 ± 11.10  | 0.44 | 38.71 ± 6.55   | 0.51 | 51.83 ± 18.23  | 0.53  | 39.00          | 0.18 | 46.00          | 0.61 |

|                      |              |             |              |      |              |             |               |      |              |      |
|----------------------|--------------|-------------|--------------|------|--------------|-------------|---------------|------|--------------|------|
|                      | 47.47 ± 6.80 |             | 45.50 ± 9.71 |      | 45.50 ± 8.42 |             | 48.00 ± 11.26 |      | 41.83 ± 8.63 |      |
| <b>GCL THICKNESS</b> |              |             |              |      |              |             |               |      |              |      |
| CENTRAL              | 21.25 ± 1.38 | <b>0.04</b> | 19.25 ± 5.37 | 0.85 | 16.40 ± 4.03 | 0.80        | 14.00         | 0.34 | 11.00        | 0.31 |
|                      | 22.82 ± 2.50 |             | 18.25 ± 2.08 |      | 16.92 ± 3.57 |             | 15.67 ± 1.52  |      | 16.33 ± 3.50 |      |
| INNER INFERIOR       | 27.50 ± 1.77 | 0.55        | 26.25 ± 3.50 | 0.71 | 25.40 ± 6.18 | 0.08        | 23.00         | 0.34 | 23.00        | 0.60 |
|                      | 28.06 ± 2.27 |             | 26.25 ± 0.57 |      | 22.77 ± 4.20 |             | 24.33 ± 1.52  |      | 21.33 ± 6.08 |      |
| OUTER INFERIOR       | 27.00 ± 1.06 | 0.81        | 26.50 ± 5.50 | 0.85 | 25.60 ± 4.33 | 0.07        | 19.00         | 0.15 | 24.00        | 0.78 |
|                      | 26.76 ± 2.04 |             | 25.75 ± 1.52 |      | 24.00 ± 4.08 |             | 24.67 ± 1.15  |      | 21.83 ± 6.82 |      |
| INNER SUPERIOR       | 25.75 ± 1.38 | 0.17        | 23.50 ± 5.03 | 0.85 | 24.00 ± 6.96 | 0.61        | 21.00         | 0.15 | 17.00        | 0.61 |
|                      | 26.71 ± 1.61 |             | 20.25 ± 5.29 |      | 20.54 ± 2.98 |             | 17.00 ± 1.73  |      | 17.67 ± 5.39 |      |
| OUTER SUPERIOR       | 25.38 ± 1.92 | 0.79        | 23.75 ± 4.99 | 0.59 | 23.20 ± 3.89 | 0.65        | 27.00         | 0.18 | 19.00        | 0.31 |
|                      | 25.41 ± 2.78 |             | 23.00 ± 3.00 |      | 22.15 ± 3.60 |             | 24.00 ± 2.00  |      | 20.33 ± 6.15 |      |
| INNER NASAL          | 25.13 ± 2.58 | 0.15        | 23.63 ± 2.58 | 0.85 | 22.80 ± 5.45 | 0.62        | 13.00         | 0.18 | 19.00        | 0.61 |
|                      | 26.65 ± 2.14 |             | 23.25 ± 2.08 |      | 21.08 ± 5.04 |             | 21.00 ± 1.00  |      | 19.67 ± 5.82 |      |
| OUTER NASAL          | 25.75 ± 1.38 | 0.05        | 25.88 ± 1.70 | 0.85 | 24.40 ± 6.22 | 0.55        | 15.00         | 0.18 | 20.00        | 0.13 |
|                      | 27.12 ± 1.72 |             | 24.75 ± 2.08 |      | 21.08 ± 6.31 |             | 24.67 ± 1.52  |      | 22.40 ± 1.67 |      |
| INNER TEMPORAL       | 24.63 ± 2.38 | 0.17        | 23.63 ± 8.66 | 0.85 | 24.40 ± 7.89 | 0.21        | 22.00         | 0.18 | 20.00        | 0.61 |
|                      | 26.00 ± 3.69 |             | 23.25 ± 2.08 |      | 19.54 ± 3.47 |             | 19.67 ± 1.52  |      | 18.50 ± 5.35 |      |
| OUTER TEMPORAL       | 26.63 ± 1.50 | 0.45        | 25.38 ± 6.18 | 0.46 | 28.80 ± 8.16 | <b>0.05</b> | 24.00         | 0.34 | 22.00        | 0.60 |
|                      | 26.76 ± 2.99 |             | 25.50 ± 1.00 |      | 23.54 ± 2.69 |             | 25.33 ± 1.52  |      | 20.17 ± 5.74 |      |
| TOTAL VOLUME         | 0.18 ± 0.00  | 0.20        | 0.17 ± 0.01  | 0.27 | 0.17 ± 0.05  | 0.81        | 0.14          | 0.15 | 0.14         | 0.43 |
|                      | 0.18 ± 0.01  |             | 0.16 ± 0.09  |      | 0.15 ± 0.01  |             | 0.15 ± 0.01   |      | 0.13 ± 0.04  |      |

**Supplementary Table S2: Neuroretinal measurements according to sex in the episcleral sclerosis vein model using OCT over 24 weeks of follow-up.** EPI<sub>m</sub>: episcleral sclerosis model;  $\mu\text{m}$ : microns; w: week; RNFL: retinal nerve fiber layer; GCL: ganglion cell layer complex; OCT: optical coherence tomography;  $p < 0.05$ : statistical significance. Up: male; down: female. Cells colored gray if males had lower thickness measurements.
