# Supplementary material for: Influence of Sex on Neuroretinal Degeneration: Six-Month Follow-Up in Rats With Chronic Glaucoma
Source: PubMed Central journal article supplement — Invest Ophthalmol Vis Sci. 2021 Oct 13;62(13):9. doi: 10.1167/iovs.62.13.9 (PMC8525827; doi:10.1167/iovs.62.13.9), 2021-10-13
Supplement: iovs-62-13-9_s003.pdf [file iovs-62-13-9_s003.pdf]

| NEURORETINAL MEASUREMENTS ACCORDING TO SEX IN THE Ms20/10 model |                    |      |                    |      |                    |      |                    |      |                    |      |
|-----------------------------------------------------------------|--------------------|------|--------------------|------|--------------------|------|--------------------|------|--------------------|------|
| OCT PARAMETERS ( $\mu\text{m}$ )                                | BASELINE           |      | 8 w                |      | 12 w               |      | 18 w               |      | 24 w               |      |
|                                                                 | Mean $\pm$ SD      | p    |
| <b>RETINAL THICKNESS</b>                                        |                    |      |                    |      |                    |      |                    |      |                    |      |
| CENTRAL                                                         | 270.00 $\pm$ 10.72 | 0.86 | 271.20 $\pm$ 9.13  | 0.07 | 250.50 $\pm$ 3.53  | 0.08 | 263.50 $\pm$ 3.53  | 0.99 | 257.50 $\pm$ 47.37 | 0.99 |
|                                                                 | 271.67 $\pm$ 14.79 |      | 264.86 $\pm$ 12.65 |      | 281.00 $\pm$ 8.00  |      | 260.33 $\pm$ 13.57 |      | 268.75 $\pm$ 6.02  |      |
| INNER INFERIOR                                                  | 259.11 $\pm$ 8.94  | 0.08 | 253.80 $\pm$ 5.95  | 0.27 | 252.50 $\pm$ 4.95  | 0.99 | 248.00 $\pm$ 9.89  | 0.76 | 249.00 $\pm$ 21.21 | 0.64 |
|                                                                 | 255.00 $\pm$ 5.56  |      | 253.14 $\pm$ 11.89 |      | 249.33 $\pm$ 11.24 |      | 243.67 $\pm$ 12.05 |      | 246.75 $\pm$ 14.05 |      |
| OUTER INFERIOR                                                  | 248.78 $\pm$ 7.23  | 0.06 | 247.20 $\pm$ 8.64  | 0.32 | 239.00 $\pm$ 4.24  | 0.55 | 234.00 $\pm$ 4.24  | 0.99 | 237.50 $\pm$ 13.43 | 0.64 |
|                                                                 | 244.87 $\pm$ 3.44  |      | 245.86 $\pm$ 13.08 |      | 239.33 $\pm$ 8.08  |      | 234.33 $\pm$ 2.08  |      | 232.75 $\pm$ 10.24 |      |
| INNER SUPERIOR                                                  | 254 $\pm$ 8.44     | 0.23 | 248.40 $\pm$ 7.71  | 0.30 | 232.50 $\pm$ .70   | 0.08 | 239.50 $\pm$ 4.70  | 0.56 | 249.50 $\pm$ 28.99 | 0.64 |
|                                                                 | 249.33 $\pm$ 5.49  |      | 257.57 $\pm$ 30.01 |      | 249.33 $\pm$ 17.61 |      | 237.33 $\pm$ 9.29  |      | 245.25 $\pm$ 12.28 |      |
| OUTER SUPERIOR                                                  | 251.44 $\pm$ 9.30  | 0.13 | 253.83 $\pm$ 7.27  | 0.12 | 239.00 $\pm$ 1.41  | 0.24 | 237.00 $\pm$ 1.41  | 0.56 | 248.50 $\pm$ 19.09 | 0.99 |
|                                                                 | 249.47 $\pm$ 3.55  |      | 256.43 $\pm$ 23.58 |      | 248.00 $\pm$ 67.81 |      | 239.00 $\pm$ 8.54  |      | 249.25 $\pm$ 8.26  |      |
| INNER NASAL                                                     | 256.00 $\pm$ 8.78  | 0.29 | 256.20 $\pm$ 7.44  | 0.05 | 243.50 $\pm$ .70   | 0.56 | 244.00 $\pm$ 2.82  | 0.56 | 239.00 $\pm$ 32.52 | 0.99 |
|                                                                 | 251.53 $\pm$ 7.25  |      | 252.14 $\pm$ 17.94 |      | 246.67 $\pm$ 13.05 |      | 245.00 $\pm$ 10.58 |      | 247.75 $\pm$ 5.43  |      |
| OUTER NASAL                                                     | 250.22 $\pm$ 7.05  | 0.07 | 253.00 $\pm$ 9.28  | 0.07 | 239.50 $\pm$ 6.36  | 0.99 | 237.50 $\pm$ 2.12  | 0.76 | 239.50 $\pm$ 17.67 | 0.81 |

|                       |                |      |                |      |                |      |               |      |                |      |
|-----------------------|----------------|------|----------------|------|----------------|------|---------------|------|----------------|------|
|                       | 246.67 ± 4.41  |      | 252.43 ± 19.73 |      | 244.00 ± 11.53 |      | 238.33 ± 7.76 |      | 243.25 ± 9.35  |      |
| INNER TEMPORAL        | 254.78 ± 10.88 | 0.18 | 251.80 ± 8.29  | 0.25 | 242.50 ± 4.95  | 0.99 | 242.00 ± 2.82 | 0.56 | 258.50 ± 24.74 | 0.64 |
|                       | 252 ± 7.53     |      | 261.29 ± 34.63 |      | 245.33 ± 10.69 |      | 237.67 ± 6.65 |      | 241.75 ± 4.19  |      |
| OUTER TEMPORAL        | 250.56 ± 8.58  | 0.07 | 255.40 ± 7.91  | 0.02 | 242.50 ± 6.36  | 0.56 | 242.50 ± 0.70 | 0.76 | 263.00 ± 9.89  | 0.06 |
|                       | 247.07 ± 4.55  |      | 262.29 ± 31.94 |      | 248.67 ± 12.66 |      | 242.00 ± 4.00 |      | 244.50 ± 8.54  |      |
| TOTAL VOLUME          | 1.79 ± 0.05    | 0.13 | 1.76 ± 0.07    | 0.08 | 1.71 ± 0.02    | 0.37 | 1.71 ± 0.01   | 0.99 | 1.76 ± 0.15    | 0.99 |
|                       | 1.77 ± 0.44    |      | 1.70 ± 0.02    |      | 1.76 ± 0.07    |      | 1.70 ± 0.05   |      | 1.74 ± 0.04    |      |
| <b>RNFL THICKNESS</b> |                |      |                |      |                |      |               |      |                |      |
| GLOBAL                | 45.89 ± 4.50   | 0.94 | 43.20 ± 8.26   | 0.85 | 42.50 ± 3.53   | 0.56 | 41.00 ± 2.82  | 0.37 | 34.50 ± 16.26  | 0.99 |
|                       | 46.07 ± 4.41   |      | 41.67 ± 3.42   |      | 45.33 ± 3.21   |      | 39.00 ± 3.00  |      | 43.00 ± 2.16   |      |
| INFERIOR TEMPORAL     | 45.56 ± 7.09   | 0.29 | 43.20 ± 10.12  | 0.59 | 42.50 ± 10.60  | 0.56 | 35.00 ± 1.41  | 0.76 | 38.00 ± 9.89   | 0.35 |
|                       | 47.47 ± 7.23   |      | 42.33 ± 5.06   |      | 46.67 ± 5.50   |      | 38.00 ± 6.08  |      | 48.00 ± 12.96  |      |
| INFERIOR NASAL        | 46.00 ± 5.59   | 0.49 | 45.60 ± 5.24   | 0.31 | 45.50 ± 4.95   | 0.08 | 41.00 ± 2.82  | 0.76 | 38.00 ± 2.82   | 0.16 |
|                       | 47.53 ± 6.60   |      | 44.17 ± 5.99   |      | 55.33 ± 4.72   |      | 39.67 ± 7.57  |      | 50.25 ± 11.14  |      |
| SUPERIOR TEMPORAL     | 50.56 ± 9.20   | 0.67 | 33.80 ± 12.58  | 0.05 | 38.00 ± 12.72  | 0.56 | 40.00 ± 5.65  | 0.37 | 34.00 ± 22.62  | 0.64 |
|                       | 48.67 ± 8.15   |      | 46.33 ± 5.96   |      | 48.00 ± 6.08   |      | 35.67 ± 2.51  |      | 44.50 ± 6.75   |      |
| SUPERIOR NASAL        | 38 ± 7.79      | 0.93 | 31.60 ± 23.35  | 0.76 | 37.00 ± 2.82   | 0.56 | 34.50 ± 4.95  | 0.56 | 27.50 ± 20.50  | 0.99 |
|                       | 39.60 ± 7.77   |      | 33.50 ± 7.24   |      | 34.33 ± 4.93   |      | 38.33 ± 9.60  |      | 30.50 ± 4.72   |      |

|                      |              |      |               |      |               |      |              |      |               |      |
|----------------------|--------------|------|---------------|------|---------------|------|--------------|------|---------------|------|
| NASAL                | 43.11 ± 7.04 | 0.78 | 45.00 ± 7.67  | 0.19 | 42.00 ± 7.07  | 0.76 | 42.00 ± 1.41 | 0.56 | 28.50 ± 19.09 | 0.16 |
|                      | 43.80 ± 5.33 |      | 41.00 ± 3.62  |      | 41.67 ± 8.38  |      | 39.67 ± 8.14 |      | 43.75 ± 4.19  |      |
| TEMPORAL             | 50.67 ± 9.87 | 0.87 | 48.40 ± 12.90 | 0.72 | 46.50 ± 10.60 | 0.99 | 46.00 ± 2.82 | 0.37 | 42.50 ± 17.67 | 0.99 |
|                      | 48.33 ± 7.18 |      | 44.33 ± 6.57  |      | 47.67 ± 4.16  |      | 40.33 ± 6.80 |      | 41.50 ± 3.31  |      |
| <b>GCL THICKNESS</b> |              |      |               |      |               |      |              |      |               |      |
| CENTRAL              | 21.89 ± 2.23 | 0.82 | 18.60 ± 2.40  | 0.47 | 16.50 ± 0.70  | 0.07 | 17.50 ± 2.12 | 0.76 | 15.00 ± 5.65  | 0.35 |
|                      | 22.80 ± 2.07 |      | 20.00 ± 3.65  |      | 21.33 ± 0.57  |      | 18.67 ± 3.05 |      | 19.00 ± 1.82  |      |
| INNER INFERIOR       | 28.78 ± 1.60 | 0.02 | 26.80 ± 3.45  | 0.34 | 26.00 ± 2.82  | 0.76 | 26.50 ± 2.12 | 0.19 | 22.00 ± 5.65  | 0.47 |
|                      | 28.00 ± 1.41 |      | 26.00 ± 2.22  |      | 24.67 ± 0.57  |      | 24.67 ± 0.57 |      | 25.25 ± 1.50  |      |
| OUTER INFERIOR       | 27.89 ± 1.38 | 0.07 | 26.60 ± 3.55  | 0.44 | 25.00 ± 1.41  | 0.54 | 24.50 ± 0.70 | 0.54 | 19.50 ± 9.19  | 0.81 |
|                      | 26.87 ± 1.18 |      | 26.57 ± 4.19  |      | 24.00 ± 2.00  |      | 25.00 ± 1.00 |      | 23.50 ± 1.73  |      |
| INNER SUPERIOR       | 27.89 ± 1.97 | 0.03 | 19.80 ± 4.50  | 0.38 | 22.50 ± 6.36  | 0.99 | 22.00 ± 0.00 | 0.18 | 18.50 ± 4.95  | 0.34 |
|                      | 26.40 ± 1.35 |      | 23.71 ± 3.91  |      | 24.33 ± 2.08  |      | 20.67 ± 1.15 |      | 22.50 ± 3.31  |      |
| OUTER SUPERIOR       | 26.00 ± 2.25 | 0.92 | 21.60 ± 3.93  | 0.47 | 24.50 ± 2.12  | 0.99 | 24.50 ± .70  | 0.54 | 19.50 ± 9.19  | 0.64 |
|                      | 25.53 ± 2.15 |      | 23.71 ± 3.27  |      | 24.00 ± 3.60  |      | 25.00 ± 1.00 |      | 23.25 ± 3.30  |      |
| INNER NASAL          | 27.33 ± 1.87 | 0.12 | 21.80 ± 1.78  | 0.05 | 23.00 ± 2.82  | 0.56 | 24.00 ± 1.41 | 0.13 | 17.50 ± 10.60 | 0.81 |
|                      | 25.80 ± 2.18 |      | 23.57 ± 1.63  |      | 24.33 ± 2.51  |      | 21.67 ± 1.52 |      | 23.75 ± 0.95  |      |
| OUTER NASAL          | 27.67 ± 1.29 | 0.08 | 24.80 ± 2.48  | 0.58 | 25.00 ± 1.41  | 0.76 | 25.00 ± 0.00 | 0.54 | 18.50 ± 6.36  | 0.35 |

2

3

4

5

6

7

8

9

10

11

12

|                |              |      |              |      |              |      |              |      |              |      |
|----------------|--------------|------|--------------|------|--------------|------|--------------|------|--------------|------|
|                | 26.53 ± 1.71 |      | 25.00 ± 2.01 |      | 24.00 ± 2.64 |      | 24.67 ± 1.15 |      | 23.00 ± 1.82 |      |
| INNER TEMPORAL | 27.11 ± 2.37 | 0.04 | 21.80 ± 5.19 | 0.04 | 24.50 ± .70  | 0.56 | 19.00 ± 7.07 | 0.56 | 20.50 ± 6.36 | 0.63 |
|                | 25.87 ± 1.48 |      | 24.00 ± 5.01 |      | 23.33 ± 2.51 |      | 23.33 ± 2.51 |      | 22.00 ± 3.83 |      |
| OUTER TEMPORAL | 28.00 ± 1.47 | 0.05 | 26.00 ± 5.78 | 0.91 | 26.50 ± 2.12 | 0.24 | 22.00 ± 4.24 | 0.19 | 21.50 ± 6.36 | 0.99 |
|                | 27.13 ± 1.32 |      | 24.57 ± 3.67 |      | 23.67 ± 3.05 |      | 25.33 ± 0.57 |      | 23.00 ± 1.41 |      |
| TOTAL VOLUME   | 0.18 ± 0.01  | 0.22 | 0.16 ± 0.01  | 0.68 | 0.17 ± 0.01  | 0.76 | 0.16 ± 0.00  | 0.73 | 0.13 ± 0.04  | 0.63 |
|                | 0.18 ± 0.00  |      | 0.16 ± 0.01  |      | 0.16 ± 0.01  |      | 0.16 ± 0.00  |      | 0.16 ± 0.01  |      |

**Supplementary Table S3: Neuroretinal measurements according to sex in the microsphere model using OCT over 24 weeks of follow-up.**

Ms20/10: microsphere 20/10 model;  $\mu\text{m}$ : microns; w: week; RNFL: retinal nerve fiber layer; GCL: ganglion cell layer complex; OCT: optical coherence tomography;  $p < 0.05$ : statistical significance; SD: standard deviation. Up: male; down: female. Cells colored gray if males had lower thickness measurements.
